# Supplementary material for: Cropland Footprints of Australian Dietary Choices
Source: Nutrients. 2020 Apr 25;12(5):1212. doi: 10.3390/nu12051212 (PMC7282022; doi:10.3390/nu12051212)
Supplement: Supplementary file 1 [file nutrients-12-01212-s001.xlsx]

## Sheet: Introduction
Supplementary Material
Cropland footprints of Australian dietary choices
Bradley G. Ridoutt 1,2, Kimberley Anastasiou 3 , Danielle Baird 3 , Javier Navarro Garcia 4 and Gilly A. Hendrie 3
1. Commonwealth Scientific and Industrial Research Organisation (CSIRO) Agriculture and Food, Clayton South, Victoria, Australia; brad.ridoutt@csiro.au
2. University of the Free State, Department of Agricultural Economics, Bloemfontein, South Africa
3. CSIRO Health and Biosecurity, Adelaide, South Australia, Australia; danielle.baird@csiro.au; kim.anastasiou@csiro.au; gilly.hendrie@csiro.au
4. CSIRO Agriculture and Food, St Lucia, Queensland, Australia; javi.navarro@csiro.au
Contents
Sheet 1	Table 1. Sample size by age and gender
Sheet 2	Table 2. Number of 19 to 50 year old adults in the quadrant analysis
Sheet 3	Table 3. Cropland footprints of individual foods
Sheet 4	Table 4. Cropland footprints of Australian adult diets by age group and gender
Sheet 5	Table 5. Contribution of different foods (%) to the cropland scarcity footprint of Australian adult daily diets
Sheet 6	Table 6. Contribution of different foods (%) to the cropland biodiversity footprint of Australian adult daily diets
Sheet 7	Table 7. Contribution of different foods (%) to the cropland malnutrition footprint of Australian adult daily diets
Sheet 8	Figure 1. Scatterplots showing diversity of individual adult daily diets
Sheet 9	Table 8. Dietary intake and cropland biodiversity footprint
Sheet 10	Table 9. Dietary intake and cropland malnutrition footprint
Sheet 11	Table 10. Cropland biodiversity footprint of the current and recommended Australian adult (19 to 50 year) daily diet
Sheet 12	Table 11. Cropland malnutrition footprint of the current and recommended Australian adult (19 to 50 year) daily diet

## Sheet: Sheet1
Suplementary Table 1
Sample size by age and gender
Age category	Male	Female	Total
19 to 50 years	2408	2749	5157
51 to 70 years	1341	1565	2906
71+ years	533	745	1278
Total	4282	5059	9341

## Sheet: Sheet2
Supplementary Table 2
Number of 19 to 50 year old adults in the quadrant analysis
Footprint	Quadrant	Count
Cropland scarcity footprint	LQ-LF	914
	LQ-HF	832
	HQ-LF	824
	HQ-HF	751
	Within 0.25 SD of mean	1836
Cropland biodiversity footprint	LQ-LF	832
	LQ-HF	796
	HQ-LF	836
	HQ-HF	633
	Within 0.25 SD of mean	2060
Cropland malnutrition footprint	LQ-LF	920
	LQ-HF	832
	HQ-LF	852
	HQ-HF	721
	Within 0.25 SD of mean	1832
HQ and LQ refer to higher and lower diet quality
HF and LF refer to higher and lower footprint

## Sheet: Sheet3
Supplementary Table 3
Cropland footprints of individual foods
All data is edible portion, uncooked
Cropland occupation (CO); Cropland scarcity footprint (CSF), Cropland malnutrition footprint (CMF), cropland biodiversity footprint (CBF)
			CROPLAND FOOTPRINTS
		CO	CSF	CMF	CBF
Food	Notes	m2.yr/kg	m2.yr-e/kg	DALY/kg	PDF/kg
egg	whole egg without shell	10.2694	9.18905	3.5503e-05	1.1489e-12
egg powder		44.2647	39.608	0.00015303	4.95217e-12
beef meat	boneless	9.45459	9.06971	3.31775e-05	1.20155e-12
beef offal		5.36847	5.14993	1.88387e-05	6.8226e-13
processed beef products		9.45459	9.06971	3.31775e-05	1.20155e-12
game meat	boneless	0	0	0	0
pig meat	boneless	28.8307	24.5413	9.34508e-05	3.30865e-12
pig offal		5.54305	4.71836	1.7967e-05	6.36127e-13
processed pork products		28.8307	24.5413	9.34508e-05	3.30865e-12
lamb meat	boneless	6.61707	7.09849	2.37018e-05	1.01479e-12
lamb offal		3.00582	3.22451	1.07666e-05	4.60973e-13
processed lamb products		6.61707	7.09849	2.37018e-05	1.01479e-12
poultry meat	boneless	18.2035	16.2402	6.1802e-05	1.97495e-12
poultry offal		9.24822	8.25075	3.13983e-05	1.00336e-12
processed poultry products		18.2035	16.2402	6.1802e-05	1.97495e-12
lobster, wildcaught	boneless	0	0	0	0
prawn, wildcaught	boneless	0	0	0	0
mixed fish, wildcaught	boneless	0	0	0	0
salmon, aquaculture	boneless	6.76744	6.11227	2.25714e-05	9.37433e-13
sausage, beef		7.36307	7.07885	2.59454e-05	9.22712e-13
sausage, lamb		5.23493	5.60044	1.88387e-05	7.82645e-13
sausage, pork		21.8952	18.6826	7.11504e-05	2.50304e-12
sausage, chicken		13.9248	12.4567	4.74139e-05	1.50276e-12
whole milk		1.72536	1.75345	6.04858e-06	2.53792e-13
cheese		8.79932	8.9426	3.08477e-05	1.29434e-12
butter		11.7324	11.9235	4.11303e-05	1.72578e-12
cream		6.55636	6.66311	2.29846e-05	9.64408e-13
skim milk		1.20775	1.22742	4.234e-06	1.77654e-13
whole milk powder		13.4578	13.6769	4.71789e-05	1.97957e-12
whey powder		13.1127	13.3262	4.59692e-05	1.92882e-12
ice-cream, regular fat and sugar sweetened		2.81862	2.87697	1.02925e-05	6.61417e-13
yogurt, no sugar		1.89789	1.9288	6.65343e-06	2.79171e-13
yogurt, sugar sweetened		1.83989	1.87551	6.63704e-06	3.82826e-13
sugar	white, refined	0.931195	1.04072	6.3802e-06	2.00677e-12
molasses		0.191624	0.214162	1.31294e-06	4.12959e-13
vegetable, starchy roots		0.423426	0.570077	1.88685e-06	1.46378e-13
vegetable, excluding starchy roots and avocado		0.473568	0.637586	2.1103e-06	1.63712e-13
avocado		4.84239	5.97736	2.91097e-05	7.4897e-13
citrus		1.02197	0.7591	2.47243e-06	8.85496e-14
apples		0.443664	0.886165	1.82707e-06	1.41182e-13
pears		0.165431	0.267188	6.23175e-07	1.02558e-14
stone fruit	including berries	2.07359	2.5431	6.73375e-06	2.31509e-13
tropical stone fruit	e.g. mango	5.12724	6.32897	3.0822e-05	7.93027e-13
plantation fruit	e.g. banana, pineapple	0.899746	0.788956	7.51144e-06	1.84011e-12
grapes		1.84683	2.13485	5.60831e-06	2.72786e-13
almond		19.1721	15.0275	7.53473e-05	7.07463e-12
peanut		6.09991	6.34491	2.52129e-05	4.40246e-13
hazelnut		15.1862	13.7656	0.000178173	1.70621e-12
nut, other		12.8388	10.0633	5.04569e-05	4.73758e-12
canola oil		17.5196	16.6538	5.87233e-05	3.12286e-12
sunflower oil		19.5185	20.9643	7.10285e-05	1.36853e-12
safflower oil		18.7517	17.825	6.28531e-05	3.34248e-12
peanut oil		11.2908	11.7443	4.66685e-05	8.14883e-13
olive oil		9.26766	11.3661	3.00957e-05	1.0347e-12
soybean oil		8.75842	9.1102	3.62014e-05	6.32118e-13
palm oil		2.67758	5.81691	8.36569e-05	2.2862e-12
pulse, canned or soaked	e.g. lupin, chickpea, faba bean, lentil	2.95955	2.36628	8.36736e-06	2.30839e-13
rice, brown	uncooked	1.25638	1.24309	3.89563e-06	7.8348e-14
rice, white	uncooked	1.43587	1.42067	4.45214e-06	8.95406e-14
rice flour, white		1.43587	1.42067	4.45214e-06	8.95406e-14
oats		6.03421	5.01095	1.92477e-05	7.04324e-13
rye flour		5.30873	4.40849	1.69336e-05	6.19644e-13
wheat flour, brown		3.98307	3.30763	1.2705e-05	4.64911e-13
wheat flour, white		4.65817	3.86825	1.48584e-05	5.43709e-13
barley		5.8666	4.87176	1.8713e-05	6.84759e-13
wheat bran		6.06611	5.03744	1.93494e-05	7.08047e-13
wheat germ		12.5896	10.4547	4.01579e-05	1.46948e-12
millet		2.92477	3.00073	1.22598e-05	2.49252e-13
corn flour		4.00669	4.11075	1.67949e-05	3.41454e-13
cocoa paste		24.6648	42.7691	0.000527793	8.30331e-12
cocoa butter		37.7844	65.5186	0.000808534	1.272e-11
cocoa powder		13.0305	22.595	0.000278834	4.38665e-12
coffee, roasted bean		14.1019	29.3738	0.000401881	1.12664e-11
tea leaves		6.59838	10.4997	0.000147883	6.41056e-12
margarine		11.6876	11.4715	4.00159e-05	1.76671e-12
bread, wheat, white		3.26072	2.70777	1.04009e-05	3.80596e-13
bread, wheat, wholemeal		2.78815	2.31534	8.89353e-06	3.25438e-13
sultata		8.68011	10.0338	2.63591e-05	1.2821e-12
dried apricot		10.7826	13.2241	3.50155e-05	1.20385e-12
lolly	jube type	2.44519	2.35857	9.99023e-06	7.17855e-13
milk chocolate		11.0715	16.6059	0.000172644	3.89123e-12
jam	with stone fruit or berry	1.20191	1.43353	5.24558e-06	8.9531e-13
popcorn		6.77626	7.22102	3.30973e-05	9.16777e-13
licorice		1.75211	1.55685	6.88754e-06	9.27425e-13
mayonnaise		13.2843	14.1799	4.85179e-05	1.1276e-12
soy sauce		0.817934	0.850785	3.38079e-06	5.90324e-14
sauce tomato, commercial		0.962253	1.24441	4.82331e-06	7.37015e-13
hazelnut spread		4.90811	6.22249	6.93411e-05	2.20628e-12
honey		0	0	0	0
water, bottled		0	0	0	0
water, tap		0	0	0	0
soft drink (with sugar)		0.102431	0.114479	7.01822e-07	2.20744e-13
soft drink (diet)		0	0	0	0
sports drink		0.0646106	0.0722097	4.42688e-07	1.39239e-13
juice, apple		0.683243	1.36469	2.81369e-06	2.1742e-13
juice, orange		1.83954	1.36638	4.45038e-06	1.59389e-13
juice, other citrus		2.04393	1.5182	4.94486e-06	1.77099e-13
juice, grape		2.45629	2.83936	7.45906e-06	3.62806e-13
juice, pineapple		4.49873	3.94478	3.75572e-05	9.20055e-12
juice, vegetable		0.947136	1.27517	4.2206e-06	3.27425e-13
juice, fruit & vegetable blend		1.1591	1.33251	3.96253e-06	2.50398e-13
wine		2.65426	3.0682	8.06024e-06	3.92047e-13
beer		1.22874	1.01871	3.93121e-06	1.43286e-13
rum	as representative of spirits	0.209014	0.233597	1.43209e-06	4.50435e-13
apple cider		0.683243	1.36469	2.81369e-06	2.1742e-13
chocolate flavoured milk		1.7987	1.92623	8.79301e-06	3.82769e-13
coffee flavoured milk		1.80941	1.99402	1.00235e-05	4.51566e-13
other flavoured milk		1.6684	1.70028	6.00467e-06	3.38902e-13
rice beverage		0.273486	0.278853	9.0053e-07	1.78114e-14
almond beverage		0.672757	0.555646	2.61556e-06	2.19082e-13
soy beverage		0.408757	0.431792	1.59305e-06	2.90993e-14
tofu		0.956528	0.994946	3.95364e-06	6.90351e-14
cordial, without juice, concentrate	unmixed	0.374247	0.418264	2.5642e-06	8.06519e-13
cordial, 50% juice, concentrate	unmixed	1.27349	1.15041	7.97239e-06	1.93265e-12
potato chips		8.50781	9.12731	3.12059e-05	1.36173e-12
corn chips		7.91053	8.06458	2.97287e-05	8.53695e-13
extruded cheese snack		3.43863	4.20672	2.98954e-05	8.11692e-13
baslsamic vinegar		0.245629	0.283936	7.45906e-07	3.62806e-14
Milo powder		7.11046	8.40637	6.01623e-05	1.82168e-12
coconut, dessiciated		11.0053	23.2221	0.000260059	2.30495e-11
cone for dessert		4.0854	3.86531	1.83103e-05	9.89901e-13
cake, fruit, commercial, uniced		8.37118	8.65284	3.14772e-05	1.38421e-12
cake, lamington, unfilled		5.76945	6.87439	4.99266e-05	3.23954e-12
cake or cupcake, chocolate, commercial, sugar based icing		3.28811	3.97087	3.37024e-05	1.48257e-12
muffin, cake-style, berry, commercial, uniced		6.27813	6.10951	2.21542e-05	1.1082e-12
biscuit, oat (like Anzac)		5.77665	6.40697	3.79519e-05	2.91566e-12
biscuit, sweet with cream filling (assorted)		2.87665	3.26621	2.64597e-05	1.49016e-12
biscuit, plain savory (like water cracker)		5.1626	4.64393	2.18676e-05	7.94642e-13
rice cracker, plain		1.97835	2.00698	6.44943e-06	1.2791e-13
biscuit, savoury, corn cake		4.16181	4.27928	1.73372e-05	3.51725e-13
rice cake, wholegrain		1.42901	1.41875	4.50543e-06	1.00022e-13
pasta	dried, uncooked	4.65817	3.86825	1.48584e-05	5.43709e-13
pastry (shortcrust)		4.47946	4.22877	2.15204e-05	8.30616e-13
meat pie		4.76364	4.54624	1.97264e-05	7.29353e-13
apple pie		1.905	2.08696	9.0133e-06	4.78804e-13
quiche lorrianne		8.82426	8.09868	3.12391e-05	1.16864e-12
Danish custard		4.11921	3.87705	1.74339e-05	7.79317e-13
custard		2.87276	2.76229	1.02133e-05	4.42905e-13
pasty, filled with vegetables & meat		3.8114	3.73846	1.58301e-05	6.15918e-13
iced doughnut		5.48072	5.12442	1.88719e-05	9.22367e-13
croissant		6.13444	5.59743	2.05411e-05	8.72439e-13
Madiera cake		6.34183	5.76554	2.20964e-05	1.39367e-12
biscuit, chocolate coated and cream filled		7.74922	9.70584	7.83696e-05	2.34964e-12
biscuit, plain sweet		5.29841	4.84194	1.83157e-05	1.05652e-12
crispbread, wholegrain		4.85556	4.33262	1.60682e-05	5.75726e-13
crispbread, plain		5.41833	4.72698	1.76799e-05	6.45581e-13
muesli, natural with dried fruit (nut free)		6.91411	6.4512	2.19837e-05	8.28449e-13
muesli bar with nuts/seeds		8.43926	7.60325	2.88399e-05	1.39275e-12
muesli bar with fruit/nut		9.04052	8.86714	3.15043e-05	1.30204e-12
muesli bar with nut&seed/choc coat		8.96571	9.40379	5.76007e-05	1.89245e-12
breakfast cereal, wheat biscuits		3.89151	3.23963	1.25153e-05	5.11166e-13
breakfast cereal, oat cluster fruit		5.89656	5.40066	2.00724e-05	1.08719e-12
breaklfast cereal, oat cluster nut		6.97236	6.28866	2.45325e-05	1.50552e-12
breakfast cereal, puffed rice		1.37329	1.36915	4.56201e-06	2.55175e-13
breakfast cereal, flakes made from corn		3.64138	3.74286	1.54642e-05	4.66442e-13
breakfast cereal, puffed rice with chocolate		1.57796	1.89591	1.33206e-05	9.16898e-13
breakfast cereal, cornflakes with sugar coating		2.58826	2.69073	1.18722e-05	1.01659e-12
breakfast cereal, mixed grains		3.95548	3.7343	1.39629e-05	7.59975e-13

## Sheet: Sheet4
Supplementary Table 4
Cropland footprints of Australian adult diets by age group and gender
Cropland scarcity footprint (CSF; m2yr-e/person/day); Cropland biodiversity footprint (CBF; PDF/person/day); Cropland malnutrition footprint (CMF; DALY/person/day)
		Male		Female		Total
Age group	Footprint	Mean	SD	Mean	SD	Mean	SD
19 to 50 years	CSF	8.48886	4.47521	6.28472	3.17858	7.41439	4.05013
	CBF	1.41877e-12	9.98926e-13	1.05877e-12	6.06418e-13	1.24328e-12	8.50334e-13
	CMF	3.34662e-05	1.89573e-05	2.52336e-05	1.32557e-05	2.9453e-05	1.69346e-05
51 to 70 years	CSF	7.49201	3.63802	6.16099	2.96452	6.82626	3.38435
	CBF	1.26232e-12	6.61516e-13	1.04667e-12	6.14483e-13	1.15446e-12	6.47465e-13
	CMF	2.98796e-05	1.47224e-05	2.48948e-05	1.30291e-05	2.73863e-05	1.41229e-05
71+ years	CSF	6.21431	2.89444	5.40383	2.64158	5.75541	2.78325
	CBF	1.07669e-12	6.60446e-13	9.34279e-13	4.735e-13	9.96057e-13	5.66693e-13
	CMF	2.46887e-05	1.19229e-05	2.14035e-05	1.03499e-05	2.28286e-05	1.1179e-05
All adults	CSF	8.01975	4.20263	6.15091	3.07602	7.08754	3.80064
	CBF	1.34643e-12	8.98709e-13	1.04134e-12	5.96391e-13	1.19425e-12	7.78129e-13
	CMF	3.17271e-05	1.75714e-05	2.47066e-05	1.29507e-05	2.82251e-05	1.58343e-05

## Sheet: Sheet5
Supplemetary Table 5
Contribution of different foods (%) to the cropland scarcity footprint of Australian adult daily diets
	19 to 50 years			51 to 70 years			71+ years			All adults
Food group	Male	Female	Total	Male	Female	Total	Male	Female	Total	Male	Female	Total
Fruit	7.73797	10.2706	8.97272	8.52251	11.7989	10.1615	10.8893	11.0066	10.9557	8.22491	10.7743	9.49676
Vegetables	3.99559	5.74047	4.84628	4.52006	5.828	5.17434	5.2597	5.56221	5.43099	4.2483	5.74435	4.99464
Breads and cereals	12.8859	12.8543	12.8705	12.3492	12.3023	12.3258	11.9165	12.0179	11.9739	12.6553	12.6077	12.6316
Fresh meat and alternatives	27.9149	25.9521	26.958	28.851	28.2645	28.5576	26.8628	27.7666	27.3746	28.0801	26.7937	27.4383
Seafood	0.444809	0.703437	0.5709	0.820917	1.12037	0.970712	0.696587	0.876113	0.798237	0.569453	0.837677	0.703263
Beef and lamb	8.3966	7.68463	8.04948	10.4072	9.53126	9.96901	10.3451	9.57941	9.91154	9.11498	8.40722	8.7619
Poultry	12.9066	12.1437	12.5346	9.93759	11.0484	10.4933	9.98162	9.82475	9.8928	11.8416	11.5797	11.711
Pork	3.14561	2.29151	2.72921	3.7604	2.62306	3.19146	2.20948	3.24087	2.79346	3.2329	2.49027	2.86242
Vegetarian alternatives	3.00066	3.12353	3.06056	3.83109	3.90538	3.86825	3.57102	4.18408	3.91814	3.27711	3.45874	3.36772
Other livestock products	0.0206088	0.00533122	0.0131604	0.0938652	0.0360041	0.0649211	0.059089	0.0613642	0.0603772	0.0439738	0.0201164	0.0320719
Dairy and alternatives	9.59501	9.88699	9.73736	7.94594	9.98101	8.96396	9.42767	10.5844	10.0826	9.12944	9.99187	9.55968
Beverages	0.933917	1.43995	1.18063	1.66754	2.11786	1.8928	1.66402	3.04899	2.44821	1.1977	1.80871	1.50252
Discretionary foods	35.3443	32.4034	33.9105	34.4517	27.4223	30.9354	31.7993	27.8114	29.5413	34.7938	30.5131	32.6583
Sugar sweetened beverages	0.860275	0.779977	0.821127	0.479691	0.405224	0.44244	0.357492	0.427533	0.39715	0.712717	0.636969	0.674928
Biscuits, cakes, waffles	2.71408	3.55035	3.12179	3.07685	3.58375	3.33042	4.21103	4.9504	4.62967	2.94267	3.71816	3.32955
Pastries and pies	2.18029	2.15389	2.16742	2.44577	1.91352	2.17952	2.27163	1.43765	1.79942	2.26081	2.00662	2.134
Processed meat products	15.6246	12.8937	14.2932	11.3798	7.69494	9.53652	9.48836	9.14615	9.2946	13.9332	11.0392	12.4894
Dairy desserts, cream, butter	1.56293	1.70295	1.6312	2.47605	1.97765	2.22673	3.61648	2.90045	3.21105	1.99017	1.91419	1.95226
Fried potato and extruded snacks	2.30377	2.06365	2.1867	1.29767	0.768891	1.03316	0.785399	0.679316	0.725334	1.89734	1.55068	1.7244
Muesli bars, confectionary, chocolate	2.18579	2.94724	2.55703	2.5454	2.89747	2.72152	2.04186	2.00173	2.01914	2.27172	2.82642	2.54845
Alcoholic beverages	6.51616	4.20738	5.39054	9.34988	6.22465	7.78653	7.04932	3.71519	5.1615	7.33742	4.70646	6.0249
Other	1.39643	2.10423	1.74151	1.4006	1.95625	1.67856	1.97769	2.55303	2.30345	1.4478	2.11438	1.78034
Healthy fats and oils	0.746611	0.997161	0.868764	1.39116	1.63844	1.51486	1.51518	1.8559	1.7081	0.989345	1.27084	1.12978
Miscellaneous foods	0.845744	0.455029	0.655256	0.300771	0.64667	0.473802	0.665511	0.345932	0.484562	0.681088	0.495379	0.588443

## Sheet: Sheet6
Supplementary Table 6
Contribution of different foods (%) to the cropland biodiversity footprint of Australian adult daily diets
	19 to 50 years			51 to 70 years			71+ years			All adults
Food group	Male	Female	Total	Male	Female	Total	Male	Female	Total	Male	Female	Total
Fruit	7.85237	10.2827	9.03725	9.04892	12.2555	10.653	12.5659	13.5777	13.1388	8.58701	11.1987	9.8899
Vegetables	4.18485	5.85031	4.99682	5.06956	6.25706	5.66359	5.89004	6.09074	6.00368	4.57422	5.98943	5.28023
Breads and cereals	11.755	11.167	11.4683	10.8086	10.7889	10.7988	10.3939	10.4741	10.4393	11.3785	10.9845	11.1819
Fresh meat and alternatives	24.2156	22.8794	23.5641	25.1325	24.8759	25.0041	22.9084	23.3526	23.1599	24.3534	23.4822	23.9188
Seafood	0.424289	0.65927	0.538851	0.737129	1.05938	0.898331	0.619184	0.761593	0.699818	0.52671	0.780914	0.653526
Beef and lamb	7.13699	6.54084	6.84634	8.5637	7.93272	8.24806	8.4584	7.49096	7.91062	7.64146	7.03132	7.33708
Poultry	10.5741	9.81881	10.2059	8.08026	8.71627	8.39842	8.1312	7.91013	8.00603	9.68079	9.2993	9.49048
Pork	2.80401	2.01778	2.42069	3.37109	2.30771	2.83915	1.9958	2.57813	2.32552	2.8893	2.16101	2.52598
Vegetarian alternatives	3.26045	3.83941	3.54271	4.30655	4.83229	4.56954	3.65461	4.5587	4.16652	3.58068	4.194	3.88665
Other livestock products	0.015743	0.00329055	0.00967196	0.0737236	0.027538	0.0506199	0.0492169	0.0530866	0.051408	0.0344966	0.0156018	0.0250704
Dairy and alternatives	9.05969	9.10658	9.08255	7.19526	8.91115	8.05361	8.11414	9.04989	8.64397	8.46796	9.04641	8.75653
Beverages	2.25941	3.64281	2.93387	4.4027	5.74047	5.0719	4.63436	6.79749	5.85915	3.05095	4.5772	3.81236
Discretionary foods	39.2374	35.7511	37.5377	36.8413	29.2054	33.0216	33.4948	28.7056	30.7831	38.0857	33.1524	35.6246
Sugar sweetened beverages	5.87975	4.5087	5.21131	3.19859	2.20369	2.70091	2.03652	1.96968	1.99868	4.81419	3.58704	4.202
Biscuits, cakes, waffles	3.49345	4.70021	4.0818	4.0869	4.63071	4.35893	5.06364	6.08696	5.64306	3.79148	4.83822	4.31367
Pastries and pies	2.05744	2.05988	2.05863	2.47743	1.85307	2.16511	2.05636	1.32863	1.64431	2.17224	1.92014	2.04648
Processed meat products	12.7859	10.3598	11.6031	9.21442	6.15526	7.68412	7.66697	7.14611	7.37205	11.3666	8.83923	10.1058
Dairy desserts, cream, butter	1.83038	1.94522	1.88637	2.87866	2.17566	2.52699	3.72891	2.93032	3.27674	2.2812	2.12022	2.20089
Fried potato and extruded snacks	1.53834	1.35073	1.44687	0.897526	0.55867	0.728019	0.621585	0.47918	0.540954	1.28382	1.03413	1.15926
Muesli bars, confectionary, chocolate	4.11706	5.21127	4.65053	4.90187	4.89044	4.89615	4.67797	4.17538	4.39339	4.38022	5.00566	4.69223
Alcoholic beverages	6.31229	3.87791	5.12544	8.17857	5.39761	6.78744	6.13639	3.05806	4.3934	6.80762	4.20301	5.50825
Other	1.22277	1.73734	1.47364	1.00734	1.34026	1.17388	1.50644	1.53127	1.5205	1.18835	1.60477	1.39609
Healthy fats and oils	0.658648	0.858722	0.756191	1.18305	1.40475	1.29395	1.35408	1.6267	1.50844	0.862195	1.09592	0.978794
Miscellaneous foods	0.777	0.461432	0.623149	0.318111	0.560824	0.439524	0.644311	0.325179	0.463615	0.640002	0.473332	0.556855

## Sheet: Sheet7
Supplementary Table 7
Contribution of different foods (%) to the cropland malnutrition footprint of Australian adult daily diets
	19 to 50 years			51 to 70 years			71+ years			All adults
Food group	Male	Female	Total	Male	Female	Total	Male	Female	Total	Male	Female	Total
Fruit	7.58102	10.1128	8.81538	8.42128	11.4789	9.95081	10.7058	10.7755	10.7452	8.0809	10.5637	9.31948
Vegetables	3.63016	5.11685	4.35498	4.07056	5.14625	4.60866	4.74613	4.89262	4.82908	3.84707	5.09953	4.47189
Breads and cereals	12.3461	12.0109	12.1827	11.6543	11.4414	11.5478	11.4181	11.3155	11.36	12.0767	11.7755	11.9264
Fresh meat and alternatives	27.2316	24.975	26.1314	27.8507	27.224	27.5372	25.9768	26.574	26.3149	27.2925	25.7747	26.5353
Seafood	0.413198	0.671588	0.539173	0.769778	1.05462	0.912267	0.681497	0.798045	0.747488	0.533927	0.791269	0.662308
Beef and lamb	7.91149	7.13263	7.53177	9.63191	8.75511	9.19331	9.62766	8.72634	9.11732	8.53042	7.75946	8.14581
Poultry	12.6311	11.6436	12.1496	9.64307	10.6894	10.1665	9.7549	9.55513	9.64179	11.5651	11.1445	11.3553
Pork	3.07535	2.19624	2.64675	3.73303	2.54715	3.13981	2.16364	3.11802	2.70402	3.17648	2.39719	2.78771
Vegetarian alternatives	3.17994	3.3255	3.25091	3.99037	4.15041	4.07043	3.69478	4.31607	4.04657	3.44613	3.66462	3.55513
Other livestock products	0.0205067	0.00538272	0.0131332	0.0825026	0.0273351	0.0549059	0.0542974	0.0603716	0.0577367	0.040386	0.017651	0.0290441
Dairy and alternatives	8.96764	9.03995	9.0029	7.14108	9.03204	8.087	8.46508	9.43613	9.0149	8.42455	9.08266	8.75286
Beverages	2.20596	3.61584	2.89333	4.31529	5.63039	4.97315	4.623	6.81626	5.86485	2.99185	4.53255	3.76047
Discretionary foods	36.5633	33.7473	35.1904	35.0066	27.8615	31.4323	32.0253	28.1654	29.8398	35.7453	31.496	33.6254
Sugar sweetened beverages	1.03362	0.898568	0.967776	0.587188	0.420093	0.503601	0.400154	0.416991	0.409687	0.856755	0.7124	0.78474
Biscuits, cakes, waffles	3.48369	4.42637	3.94328	3.72966	4.10114	3.91549	4.71373	5.70094	5.2727	3.65727	4.48132	4.06837
Pastries and pies	2.34234	2.23595	2.29047	2.57726	1.9868	2.28189	2.37372	1.49007	1.87339	2.40932	2.08291	2.24648
Processed meat products	15.0809	12.2466	13.6991	10.7689	7.34642	9.05685	8.97845	8.65727	8.7966	13.374	10.4921	11.9363
Dairy desserts, cream, butter	1.57704	1.75512	1.66386	2.45911	2.01091	2.2349	3.42755	2.72872	3.03187	1.97824	1.93578	1.95706
Fried potato and extruded snacks	2.10088	1.90114	2.0035	1.17247	0.673667	0.92295	0.68956	0.605529	0.641981	1.72495	1.41673	1.57119
Muesli bars, confectionary, chocolate	3.75552	5.02735	4.37558	4.36002	4.89074	4.6255	3.71799	3.52909	3.61103	3.91764	4.82002	4.36781
Alcoholic beverages	5.82412	3.22911	4.55895	8.06586	4.66311	6.36369	5.83119	2.78247	4.10497	6.43797	3.57293	5.00867
Other	1.36522	2.02711	1.68792	1.28612	1.76861	1.52748	1.89295	2.25431	2.09756	1.38919	1.98175	1.6848
Healthy fats and oils	0.70264	0.953911	0.825144	1.25094	1.59243	1.42176	1.37081	1.70725	1.56131	0.910369	1.21489	1.06229
Miscellaneous foods	0.771577	0.42743	0.603792	0.289296	0.593084	0.441261	0.668957	0.317411	0.469908	0.630778	0.460528	0.545844

## Sheet: Sheet8
Supplementary Figure 1
Scatterplots showing diversity of individual adult daily diets
Cropland scarcity footprint (m2y-e/person/day) and diet quality score (range 0-100) (A); Cropland biodiversity footprint (PDF/person/day) and diet quality score (B); Cropland malnutrition footprint (DALY/person/day) and diet quality score (C)
	A						B						C

## Sheet: Sheet9
Supplementary Table 8
Dietary intake (serves/person/day) and cropland biodiversity footprint (10-12 PDF/person/day) for Australian adults (19 to 50 years)
	Higher diet quality/Lower footprint subgroup (N=836)		Lower diet quality/Higher footprint subgroup (N=796)
Food group	serves	footprint	serves	footprint
Fruit	1.52	0.0931689	1.04	0.151085
Vegetables	3.44	0.0618428	1.45	0.0463246
Breads and cereals	5.52	0.106526	3.97	0.139236
Fresh meat & alternatives	1.97	0.203253	2.51	0.423547
Seafood	0.42	0.0104549	0.12	0.00617778
Beef and lamb	0.63	0.0723473	0.69	0.130625
Poultry	0.33	0.0678641	1.08	0.19761
Pork	0.04	0.00925163	0.27	0.0558846
Vegetarian alternatives	0.55	0.0433321	0.35	0.0332497
Dairy and alternatives	1.32	0.0810632	1.52	0.112884
Discretionary foods	2	0.1161	14.88	0.997441
Miscellaneous foods		0.0401459		0.0490826
Total		0.7021		1.9196

[truncated: 3 more sheets: Sheet10, Sheet11, Sheet12]
